# Supplementary material for: How Important Are Fog and the Cloud Forest as a Water Supply in Eastern Mexico?
Source: MDPI journal article supplement (doi:10.3390/w15071286), 2023-03-24
Supplement: s1 [file s1]

# How Important Are Fog and the Cloud Forest as a Water Supply in Eastern Mexico?

Antonio Sánchez-Falfán <sup>1,2</sup>, Manuel Esperón-Rodríguez <sup>3</sup>, Juan Cervantes-Pérez <sup>2</sup>, Monica Ballinas <sup>1,4</sup> and Victor L. Barradas <sup>1,\*</sup>

<sup>1</sup> Laboratorio de Interacción Planta Atmosfera, Instituto de Ecología, Universidad Nacional Autónoma de México, Mexico City 04510, Mexico

<sup>2</sup> Facultad de Instrumentación y Ciencias Atmosféricas, Universidad Veracruzana, Xalapa 91090, Mexico

<sup>3</sup> Hawkesbury Institute for the Environment, Western Sydney University, Locked Bag 1797, Penrith, NSW 2751, Australia

<sup>4</sup> Centro de Investigación en Ciencias de Información Geoespacial, A.C., Mexico City 14240, Mexico

\* Correspondence: vlbarradas@ecologia.unam.mx

**Table S1.** Height, diameter, climatic requirements (temperature and precipitation ranges), and distribution (altitudinal range) of *Alnus acuminata*, *Cupressus benthamii*, *Crataegus mexicana*, *Pinus ayacahuite*, and *Pinus patula*.

| Species              | Height (m) | Diameter (cm) | Temperature (°C) | Precipitation (mm) | Distribution (m asl) |
|----------------------|------------|---------------|------------------|--------------------|----------------------|
| <i>A. acuminata</i>  | 10–30      | 35–100        | 5–27             | 1000–3000          | 500–2800             |
| <i>C. benthamii</i>  | 25–30      | 100           | 7–27             | 900–1200           | 1500–4000            |
| <i>C. mexicana</i>   | 10–16      | 75            | 11–18            | 1000–1500          | 1500–3000            |
| <i>P. ayacahuite</i> | 35–40      | >100          | 13–17            | 800–1500           | 2000–3500            |
| <i>P. patula</i>     | 30         | >100          | 9–23             | 750–2000           | 1800–2700            |

**Table S2.** Location and details of the individuals used for the rain gauges placement. See location in Figure 1.

| No. | Species              | Height (m) | Diameter (cm) | Location                    |
|-----|----------------------|------------|---------------|-----------------------------|
| 1   | <i>C. benthamii</i>  | 9          | 58            | 19° 36.252' N—97° 02.433' W |
| 2   | <i>P. ayacahuite</i> | 6.5        | 61            | 19° 36.224' N—97° 02.445' W |
| 3   | <i>P. ayacahuite</i> | 5          | 36            | 19° 36.230' N—97° 02.442' W |
| 4   | <i>A. acuminata</i>  | 5.5        | 55            | 19° 36.236' N—97° 02.456' W |
| 5   | <i>A. acuminata</i>  | 6          | 70            | 19° 36.240' N—97° 02.470' W |
| 6   | <i>P. patula</i>     | 9          | 69            | 19° 36.254' N—97° 02.475' W |
| 7   | <i>P. patula</i>     | 10         | 65            | 19° 36.279' N—97° 02.491' W |
| 8   | <i>A. acuminata</i>  | 13.5       | 117           | 19° 36.266' N—97° 02.499' W |
| 9   | <i>A. acuminata</i>  | 12         | 66            | 19° 36.280' N—97° 02.440' W |
| 10  | <i>P. patula</i>     | 10.5       | 74            | 19° 36.270' N—97° 02.528' W |
| 11  | <i>P. patula</i>     | 5          | 54            | 19° 36.331' N—97° 02.533' W |
| 12  | <i>P. patula</i>     | 7.5        | 44            | 19° 36.338' N—97° 02.580' W |
| 13  | <i>C. mexicana</i>   | 5          | 132           | 19° 36.319' N—97° 02.581' W |

**Table S3.** Monthly number of total precipitation events (Events) and volume of net precipitation ( $P_N$ ), gross precipitation ( $P_G$ ), and fog (Fog). Data are given in mm (except for events) according to the type of precipitation event ( $T_1$ ,  $T_2$ , and  $T_3$ ; see details in Materials and Methods).

| Month     | Events |       |       | $P_N$ |        |        | $P_G$ |        |       | Fog   |         |         |
|-----------|--------|-------|-------|-------|--------|--------|-------|--------|-------|-------|---------|---------|
|           | $T_1$  | $T_2$ | $T_3$ | $T_1$ | $T_2$  | $T_3$  | $T_1$ | $T_2$  | $T_3$ | $T_1$ | $T_2$   | $T_3$   |
| August    | 4      | 1     | 11    | 8.99  | 41.65  | 59.22  | 20.86 | 0      | 0     | 0     | 59.61   | 98.28   |
| September | 5      | 7     | 23    | 0.21  | 508.85 | 229.56 | 0.67  | 32.66  | 0     | 0     | 735.8   | 309.61  |
| October   | 5      | 17    | 56    | 0.1   | 151.97 | 14.84  | 0.36  | 27.15  | 0     | 0     | 233.76  | 88.35   |
| November  | 2      | 12    | 10    | 0.07  | 100.6  | 8.7    | 0.42  | 14.57  | 0     | 0     | 273.55  | 39.36   |
| December  | 4      | 5     | 26    | 0     | 242.88 | 28.92  | 0.67  | 21.05  | 0     | 0     | 341.84  | 136.78  |
| January   | 3      | 9     | 40    | 0     | 90.22  | 89.7   | 0.18  | 2.96   | 0     | 0     | 209.71  | 187.6   |
| February  | 3      | 5     | 21    | 0.05  | 183.82 | 25.21  | 0.18  | 27.21  | 0     | 0     | 414.41  | 71.47   |
| March     | 3      | 1     | 19    | 0     | 0.44   | 28.97  | 0.18  | 0.06   | 0     | 0     | 1.33    | 51.29   |
| April     | 9      | 6     | 47    | 0.17  | 84.89  | 32.16  | 2.72  | 11.67  | 0     | 0     | 152.42  | 118.42  |
| May       | 1      | 3     | 64    | 0     | 12.52  | 9.31   | 0.06  | 0.18   | 0     | 0     | 20.08   | 71.79   |
| June      | 1      | 6     | 38    | 0     | 68.67  | 192.8  | 0.06  | 9.37   | 0     | 0     | 68.53   | 253.38  |
| July      | 1      | 11    | 31    | 0     | 216.82 | 20.08  | 0.12  | 24.07  | 0     | 0     | 309.72  | 64.04   |
| Total     | 41     | 83    | 386   | 54    | 1600   | 1342   | 26.48 | 170.95 | 0     | 0     | 2820.76 | 1490.37 |

**Table S4.** Monthly total number of hours of total ( $P$ ), gross ( $P_G$ ), and net ( $P_N$ ) precipitation. Data are given according to the type of precipitation event ( $T_1$ ,  $T_2$ , and  $T_3$ ; see details in Materials and Methods).

| Month     | $P$   |       |       | $P_G$ |       |       | $P_N$ |       |       |
|-----------|-------|-------|-------|-------|-------|-------|-------|-------|-------|
|           | $T_1$ | $T_2$ | $T_3$ | $T_1$ | $T_2$ | $T_3$ | $T_1$ | $T_2$ | $T_3$ |
| August    | 13    | 16    | 41    | 11    | 1     | 0     | 11    | 16    | 41    |
| September | 7     | 219   | 101   | 6     | 39    | 0     | 3     | 216   | 101   |
| October   | 6     | 171   | 118   | 5     | 80    | 0     | 3     | 168   | 118   |
| November  | 2     | 235   | 34    | 2     | 66    | 0     | 2     | 235   | 34    |
| December  | 4     | 147   | 122   | 4     | 58    | 0     | 0     | 147   | 122   |
| January   | 3     | 176   | 194   | 3     | 30    | 0     | 0     | 176   | 194   |
| February  | 4     | 145   | 81    | 4     | 58    | 0     | 1     | 140   | 81    |
| March     | 3     | 3     | 94    | 3     | 1     | 0     | 0     | 3     | 94    |
| April     | 9     | 98    | 152   | 9     | 23    | 0     | 3     | 98    | 152   |
| May       | 1     | 22    | 128   | 1     | 3     | 0     | 0     | 22    | 128   |
| June      | 1     | 51    | 205   | 1     | 13    | 0     | 0     | 51    | 205   |
| July      | 1     | 317   | 72    | 1     | 63    | 0     | 0     | 317   | 72    |
| Total     | 54    | 1600  | 1342  | 54    | 1600  | 1342  | 23    | 1589  | 1342  |

**Table S5.** Values of total net ( $P_N$ ), fog ( $P_F$ ), and gross ( $P_G$ ) precipitation and total ( $I_T$ ), fog ( $I_F$ ), and rain ( $I_R$ ) interception. Data are given in mm according to the type of precipitation event ( $T_1$ ,  $T_2$ , and  $T_3$ ; see details in Materials and Methods).

| Type  | $P_N$   | $P_F$  | $P_G$   | $I_T$   | $I_F$   | $I_R$ |
|-------|---------|--------|---------|---------|---------|-------|
| $T_1$ | 0       | 9.6    | 9.6     | 16.89   | 0       | 16.89 |
| $T_2$ | 1602.6  | 100.75 | 1703.3  | 1285.72 | 1215.5  | 70.22 |
| $T_3$ | 739.46  | 0      | 739.46  | 750.92  | 750.92  | 0     |
| Total | 2342.05 | 110.34 | 2452.39 | 2053.52 | 1966.42 | 87.1  |

**Table S6.** Monthly values of total ( $I_T$ ), fog ( $I_F$ ), and rain ( $I_R$ ) interception. Data are given in mm according to the type of precipitation event ( $T_1$ ,  $T_2$ , and  $T_3$ ; see details in Materials and Methods).

| Month     | $I_T$ |        |        | $I_F$ |        |        | $I_R$ |       |       |
|-----------|-------|--------|--------|-------|--------|--------|-------|-------|-------|
|           | $T_1$ | $T_2$  | $T_3$  | $T_1$ | $T_2$  | $T_3$  | $T_1$ | $T_2$ | $T_3$ |
| August    | 11.88 | 18.14  | 39.06  | 0     | 18.07  | 39.06  | 11.88 | 0.07  | 0     |
| September | 0.45  | 258.87 | 79.42  | 0     | 245.53 | 79.42  | 0.45  | 13.34 | 0     |
| October   | 0.26  | 108.04 | 74.15  | 0     | 96.89  | 74.15  | 0.26  | 11.15 | 0     |
| November  | 0.35  | 184.22 | 27.22  | 0     | 177.84 | 27.22  | 0.35  | 6.38  | 0     |
| December  | 0.67  | 122.36 | 75.1   | 0     | 114.11 | 75.1   | 0.67  | 8.25  | 0     |
| January   | 0.18  | 122.28 | 134.1  | 0     | 121.06 | 134.1  | 0.18  | 1.22  | 0     |
| February  | 0.13  | 257.8  | 46.26  | 0     | 246.62 | 46.26  | 0.13  | 11.18 | 0     |
| March     | 0.18  | 0.95   | 22.32  | 0     | 0.92   | 22.32  | 0.18  | 0.02  | 0     |
| April     | 2.55  | 79.2   | 86.26  | 0     | 74.4   | 86.26  | 2.55  | 4.79  | 0     |
| May       | 0.06  | 7.74   | 62.49  | 0     | 7.67   | 62.49  | 0.06  | 0.07  | 0     |
| June      | 0.06  | 9.19   | 60.58  | 0     | 5.34   | 60.58  | 0.06  | 3.85  | 0     |
| July      | 0.12  | 116.93 | 43.96  | 0     | 107.04 | 43.96  | 0.12  | 9.89  | 0     |
| Total     | 16.89 | 1285.7 | 750.92 | 0     | 1215.5 | 750.92 | 16.89 | 70.22 | 0     |

**Table S7.** Values of average ( $ET_A$ ), total ( $ET$ ), fog ( $ET_F$ ), and rain ( $ET_R$ ) evapotranspiration and total ( $C_T$ ), fog ( $C_F$ ), and rain ( $C_R$ ) condensation. Data are given according to the type of precipitation event ( $T_1$ ,  $T_2$ , and  $T_3$ ; see details in Materials and Methods).

| Type  | $ET_A$<br>(mm s <sup>-1</sup> ) | $ET$<br>(mm) | $ET_F$<br>(mm) | $ET_R$<br>(mm) | $C_T$<br>(mm) | $C_F$<br>(mm) | $C_R$<br>(mm) |
|-------|---------------------------------|--------------|----------------|----------------|---------------|---------------|---------------|
| $T_1$ | $1.50 \times 10^{-4}$           | 24.73        | 0.00           | 24.73          | 1.42          | 0.00          | 1.42          |
| $T_2$ | $1.91 \times 10^{-4}$           | 1279.67      | 1196.91        | 82.76          | 21.26         | 18.59         | 2.67          |
| $T_3$ | $1.95 \times 10^{-4}$           | 709.28       | 709.28         | 0.00           | 41.64         | 41.64         | 0.00          |
| Total | $1.90 \times 10^{-4}$           | 2013.67      | 1906.18        | 107.49         | 64.33         | 60.24         | 4.09          |

**Table S8.** Monthly average ( $ET_A$ ) and volume ( $ET_{vol}$ ) of evapotranspiration. Data are given in mm according to the type of precipitation event ( $T_1$ ,  $T_2$ , and  $T_3$ ; see details in Materials and Methods).

| Month     | $ET_A$             |                    |                    | $ET_{vol}$ |        |        |
|-----------|--------------------|--------------------|--------------------|------------|--------|--------|
|           | $T_1$              | $T_2$              | $T_3$              | $T_1$      | $T_2$  | $T_3$  |
| August    | $2 \times 10^{-4}$ | $3 \times 10^{-4}$ | $3 \times 10^{-4}$ | 5.75       | 18.12  | 38.03  |
| September | $2 \times 10^{-4}$ | $3 \times 10^{-4}$ | $3 \times 10^{-4}$ | 3.65       | 246.73 | 75.34  |
| October   | $3 \times 10^{-4}$ | $2 \times 10^{-4}$ | $2 \times 10^{-4}$ | 5.9        | 106.4  | 67.92  |
| November  | $2 \times 10^{-4}$ | $2 \times 10^{-4}$ | $2 \times 10^{-4}$ | 0.81       | 184.71 | 26.18  |
| December  | $2 \times 10^{-4}$ | $2 \times 10^{-4}$ | $2 \times 10^{-4}$ | 1.83       | 123.44 | 56.15  |
| January   | $1 \times 10^{-4}$ | $2 \times 10^{-4}$ | $2 \times 10^{-4}$ | 0.39       | 119.35 | 127.82 |
| February  | $1 \times 10^{-4}$ | $3 \times 10^{-4}$ | $2 \times 10^{-4}$ | 1.16       | 271.54 | 45.44  |
| March     | $1 \times 10^{-4}$ | $9 \times 10^{-5}$ | $6 \times 10^{-5}$ | 1.34       | 1      | 21.68  |
| April     | $9 \times 10^{-5}$ | $2 \times 10^{-4}$ | $3 \times 10^{-4}$ | 3.02       | 80.26  | 85.14  |
| May       | $4 \times 10^{-5}$ | $1 \times 10^{-4}$ | $1 \times 10^{-4}$ | 0.13       | 7.92   | 62.45  |
| June      | $4 \times 10^{-5}$ | $3 \times 10^{-5}$ | $1 \times 10^{-4}$ | 0.13       | 5.24   | 59.26  |
| July      | $2 \times 10^{-4}$ | $9 \times 10^{-5}$ | $2 \times 10^{-4}$ | 0.62       | 114.95 | 43.87  |
| Total     | $1 \times 10^{-4}$ | $2 \times 10^{-4}$ | $2 \times 10^{-4}$ | 24.73      | 1279.7 | 709.28 |

**Table S9.** Monthly values of fog ( $ET_F$ ) and rain ( $ET_R$ ) evapotranspiration, total transpiration (TRP), and water consumption ( $W_C$ ). Data are given in mm according to the type of precipitation event ( $T_1$ ,  $T_2$ , and  $T_3$ ; see details in Materials and Methods).

| Month     | $ET_F$ |         |        | $ET_R$ |       |       | TRP   |       |       | $W_C$ |        |        |
|-----------|--------|---------|--------|--------|-------|-------|-------|-------|-------|-------|--------|--------|
|           | $T_1$  | $T_2$   | $T_3$  | $T_1$  | $T_2$ | $T_3$ | $T_1$ | $T_2$ | $T_3$ | $T_1$ | $T_2$  | $T_3$  |
| August    | 0      | 18.07   | 38.03  | 5.75   | 0.05  | 0     | 0.7   | 0.11  | 2.93  | 9.95  | 41.76  | 63.18  |
| September | 0      | 241.44  | 75.34  | 3.65   | 5.3   | 0     | 0.16  | 5.67  | 5.78  | -2.82 | 515.45 | 240.06 |
| October   | 0      | 92.29   | 67.92  | 5.9    | 14.12 | 0     | 0.5   | 4.71  | 8.06  | -4.8  | 154.53 | 28.49  |
| November  | 0      | 172.79  | 26.18  | 0.81   | 11.92 | 0     | 0.08  | 7.94  | 1.57  | -0.13 | 109.81 | 14.75  |
| December  | 0      | 114.11  | 56.15  | 1.83   | 9.33  | 0     | 0.25  | 5.56  | 5.22  | -0.65 | 243.13 | 85.84  |
| January   | 0      | 116.75  | 127.82 | 0.39   | 2.6   | 0     | 0.09  | 4.48  | 9.8   | 0.05  | 97.38  | 69.58  |
| February  | 0      | 246.62  | 45.44  | 1.16   | 24.92 | 0     | 0.12  | 2.66  | 2.76  | -0.93 | 172.31 | 28.79  |
| March     | 0      | 0.92    | 21.68  | 1.34   | 0.08  | 0     | 0.13  | 0.17  | 2.54  | -1.03 | 0.56   | 32.14  |
| April     | 0      | 74.4    | 85.14  | 3.02   | 5.86  | 0     | 0.47  | 3.11  | 9.08  | -1.76 | 84.93  | 42.36  |
| May       | 0      | 7.67    | 62.45  | 0.13   | 0.26  | 0     | 0.08  | 0.8   | 9.52  | 0.01  | 13.11  | 18.86  |
| June      | 0      | 5.02    | 59.26  | 0.13   | 0.22  | 0     | 0     | 1.4   | 7.48  | -0.07 | 70.43  | 201.6  |
| July      | 0      | 106.83  | 43.87  | 0.62   | 8.12  | 0     | 0.11  | 10.84 | 3.65  | -0.39 | 226.98 | 23.83  |
| Total     | 0      | 1196.91 | 709.28 | 24.73  | 82.78 | 0     | 2.68  | 47.45 | 68.38 | -2.57 | 1730.4 | 849.49 |
